# Supplementary material for: Synthesis of core–shell Co@S-doped carbon@ mesoporous N-doped carbon nanosheets with a hierarchically porous structure for strong electromagnetic wave absorption
Source: Royal Society of Chemistry journal article supplement (doi:10.1039/d0ta09393a), 2020-12-29
Supplement: d0ta09393a1.pdf [file d0ta09393a1.pdf]

## Synthesis of core-shell Co@S doped carbon@ mesoporous N doped carbon nanosheets with hierarchically porous structure for strong electromagnetic wave absorption

Bo Wen<sup>a</sup>, Haibo Yang<sup>\*a</sup>, Ying Lin<sup>\*a</sup>, Liang Ma<sup>b</sup>, Yun Qiu<sup>a</sup>, Fanfan Hu<sup>a</sup>, Yanan<sup>a</sup> Zheng

<sup>a</sup> Shaanxi Key Laboratory of Green Preparation and Functionalization for Inorganic Materials, School of Materials Science and Engineering, Shaanxi University of Science and Technology, Xi'an 710021, China

<sup>b</sup> Xianyang Non-metallic Mineral R & D Institute Co., Ltd, Xianyang 712021, China

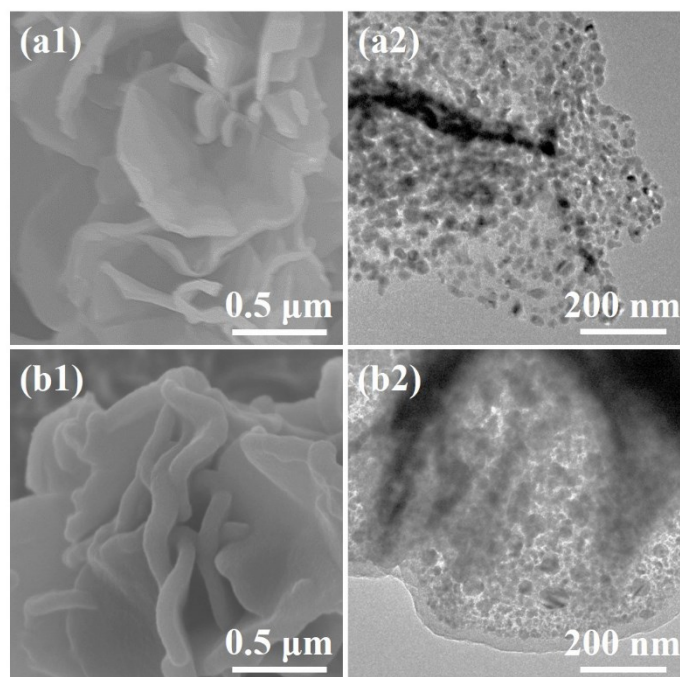

Figure S1 SEM images and TEM images of (a1, a2) Co@SC and (b1, b2) Co@SC@NC composites.

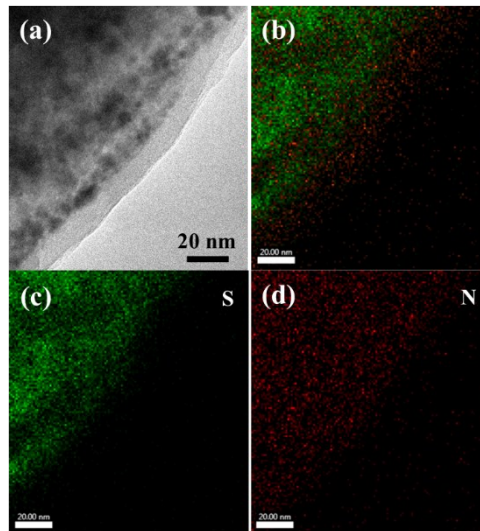

Figure S2 EDS mappings of N and S elements for the Co@SC@MNC-700 composite.

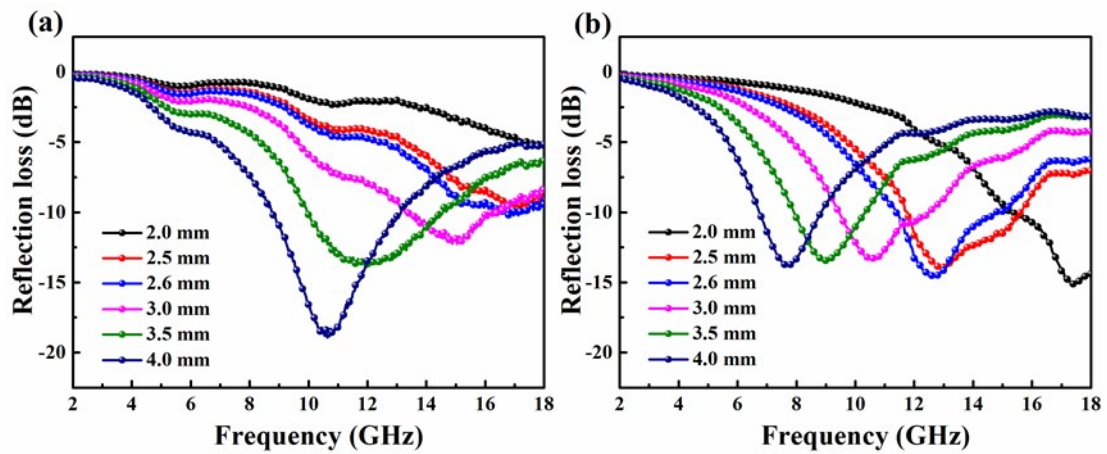

Figure S3 Reflection loss curves of the (a) Co@SC-700 and (b) core-shell Co@SC@NC-700 composites
